# Supplementary material for: Strictly diastereocontrolled photocyclodimerization of 2-anthracenecarboxylates tethered to cyclic tetrasaccharides
Source: Royal Society of Chemistry journal article supplement (doi:10.1039/c2cc34880b), 2012-01-01
Supplement: c2cc34880b.pdf [file c2cc34880b.pdf]

## Electronic Supplementary Information

### Strictly Diastereocontrolled Photocyclodimerization of 2-Anthracenecarboxylates Tethered to Cyclic Tetrasaccharide

Gaku Fukuhara,<sup>\*a</sup> Tomohiro Nakamura,<sup>a</sup> Yuko Kawanami,<sup>a</sup> Cheng Yang,<sup>a</sup> Tadashi Mori,<sup>a</sup>  
Hiroyuki Hiramatsu,<sup>b</sup> Yasufumi Dan-oh,<sup>b</sup> Kazuo Tsujimoto<sup>b</sup> and Yoshihisa Inoue<sup>\*a</sup>

<sup>a</sup> Department of Applied Chemistry, Osaka University, 2-1 Yamada-oka, Suita 565-0871, Japan

<sup>b</sup> Hayashibara Co., Ltd., 1-1-3 Shimoishii, Kita-ku, Okayama 700-0907, Japan

E-mail: gaku@chem.eng.osaka-u.ac.jp

#### Table of Contents

|                                                                                                                                                     |     |
|-----------------------------------------------------------------------------------------------------------------------------------------------------|-----|
| 1) General                                                                                                                                          | 2   |
| 2) Synthesis and Characterization of <b>AC<sub>2</sub>-CNN</b> ( <b>Figures S1-S3</b> )                                                             | 2-6 |
| 3) UV/vis and Excitation Spectra of <b>AC<sub>2</sub>-CNN</b> ( <b>Figure S4</b> )                                                                  | 7   |
| 4) Analytical Chiral HPLC ( <b>Figure S5</b> )                                                                                                      | 7   |
| 5) <i>In-in</i> , <i>in-out</i> , <i>out-in</i> , and <i>out-out</i> Conformers of <b>AC<sub>2</sub>-CNN</b> •H <sub>2</sub> O ( <b>Figure S6</b> ) | 8   |
| 6) Fluorescence Decay Profiles of <b>AC<sub>2</sub>-CNN</b> and Methyl 2-Anthracenecarboxylate <b>5</b> ( <b>Figure S7</b> )                        | 9   |

## General

**Instruments.** Melting point was measured with a BÜCHI B-545 apparatus. Mass spectrum was obtained on a Bruker Autoflex III MALDI-TOF.  $^1\text{H}$  NMR spectra at 600 MHz,  $^{13}\text{C}$  NMR spectra at 150 MHz, and 2D-HSQC and COSY spectra at 600 MHz were recorded in  $\text{DMSO}-d_6$  on a Varian INOVA-600 instrument. UV/vis and CD spectra were measured in a quartz cell (light path of 1 cm) on JASCO V-550 or V-560 and J-720WI or J-820YH instrument, respectively, both equipped with an ETC-505T temperature controller. Fluorescence spectra were recorded on a JASCO FP-6500 spectrofluorimeter. Fluorescence lifetimes were determined by the time-correlated single-photon-counting method on a Hamamatsu FL920S instrument equipped with a pulsed  $\text{H}_2$  light source. HPLC analyses of the product distribution and ee of cyclodimers were performed at 35 °C on a tandem column of Cosmosil 5C18-AR-II (Nakalai) and Chiralcel OJ-RH (Daicel) eluted with a 64:36 (v/v) mixture of deionized water and acetonitrile containing 0.1% trifluoroacetic acid at a flow rate of 0.5 mL min $^{-1}$ .

**Materials.** Cyclic nigerosylnigerose (CNN) was supplied by Hayashibara Co., Ltd. Acetonitrile and water of fluorescence-free grade were used without further purification. Methyl 2-anthracenecarboxylate (**5**) was synthesized as reported previously.<sup>1</sup>

**Spectroscopic Analyses and Photolysis Procedures.** A given amount of 2<sup>B</sup>,3<sup>B</sup>-di(2-anthroyl)-CNN (**AC<sub>2</sub>-CNN**) and **5** were dissolved in 45:55  $\text{CH}_3\text{CN}-\text{H}_2\text{O}$  to subject to the UV/vis, CD, fluorescence, excitation spectroscopies and fluorescence lifetimes at room temperature, measured in a 1 cm cell. An aqueous acetonitrile solution of **AC<sub>2</sub>-CNN** in a quartz cell (10 x 10 x 45 mm) was irradiated at 25 and -5 °C under a nitrogen atmosphere, by using a 300-W xenon lamp fitted with a band-pass filter (360 ± 10 nm). The irradiated aqueous acetonitrile solution was hydrolyzed for 24 h by adding KOH powder; the total KOH concentration was 300 mM, and the resulting solution was subjected to chiral HPLC analysis.

## Synthesis and Characterization of 2<sup>B</sup>,3<sup>B</sup>-Di(2-anthroyl)-CNN (**AC<sub>2</sub>-CNN**).

CNN (1.0 g, 1.5 mmol) was dissolved in dry DMF (50 mL), to which were added *N,N'*-dicyclohexylcarbodiimide (DCC) (700 mg, 3.4 mmol) and *N,N*-dimethyl-4-aminopyridine (DMAP) (415 mg, 3.4 mmol) under nitrogen. After the complete dissolution of the reagents, 2-anthracenecarboxylic acid (1.0 g, 4.5 mmol) was added and the mixture was stirred under nitrogen for 24 h at room temperature. After removing byproduct urea by filtration, the clear filtrate obtained was slowly poured onto diethyl ether (450 mL) and stirred for 2 h to give a precipitate, which was collected by filtration, washed with diethyl ether, and dried in vacuo to give a crude product as yellow solid (720 mg). The crude product was a mixture of CNN and

<sup>1</sup> Takaguchi, Y. US Patent 2004175568 A1 2004.

mono-, di-, and tri-AC-esters in ca. 1:2:1:0.1 (estimated from the MALDI-TOF-MS spectrum, without taking into account the difference in ionization efficiency). Although the HPLC analysis of the crude product on a Cosmosil 5C<sub>18</sub>-AR-II column (4.6 mm  $\phi$  x 150 mm; Nacalai Tesque) eluted by H<sub>2</sub>O-CH<sub>3</sub>CN (55:45) at a flow rate of 0.5 mL min<sup>-1</sup> revealed several isomer peaks in the diester region (retention time = 8-32 min), the desired diester eluted as the last peak well spaced apart from the other diester peaks, and was readily isolated by preparative HPLC on a Sumipax ODS (20 mm  $\phi$  x 250 mm; SCAS) eluted by H<sub>2</sub>O-CH<sub>3</sub>CN (58:42) at 5 mL min<sup>-1</sup> under an isocratic condition. Thus, 25 mg of the crude product was dissolved in 25 mL of H<sub>2</sub>O-CH<sub>3</sub>CN (55:45) with sonication. After removing a small amount of undissolved residue by filtration, the clear sample solution was injected into the preparative HPLC in five portions, and the fraction containing the desired product was collected. The combined fraction was evaporated and then freeze-dried to give pure 2<sup>B</sup>,3<sup>B</sup>-di(2-anthroyl)-CNN (**AC<sub>2</sub>-CNN**) as pale yellow solid (0.25 mg; 1% yield). **AC<sub>2</sub>-CNN**: dp >250 °C; <sup>1</sup>H NMR (DMSO-*d*<sub>6</sub>, 600 MHz, 25 °C):  $\delta_{\text{H}}$  8.78 (1H, s), 8.68 (1H, s), 8.63 (1H, s), 8.59 (1H, s), 8.48 (2H, s), 8.07 (1H, d, *J* = 7.0 Hz), 8.01-7.98 (5H, m), 7.84 (1H, d, *J* = 8.6 Hz), 7.71 (1H, d, *J* = 8.8 Hz), 7.51-7.46 (4H, m), 5.84 (1H, d, *J* = 3.2 Hz, B<sub>1</sub>), 5.76 (1H, t, *J* = 9.6 Hz, B<sub>3</sub>), 5.33 (1H, d, *J* = 3.1 Hz, D<sub>1</sub>), 5.15 (1H, dd, *J* = 10.3 Hz, 3.4 Hz, B<sub>2</sub>), 4.89 (1H, t, *J* = 9.7 Hz, B<sub>5</sub>), 4.65 (1H, d, *J* = 2.3 Hz, A<sub>1</sub>), 4.62 (1H, d, *J* = 2.5 Hz, C<sub>1</sub>), 4.50 (1H, t, *J* = 8.1 Hz, D<sub>5</sub>), 3.92 (1H, t, *J* = 9.1 Hz, C<sub>3</sub>), 3.83 (1H, t, *J* = 9.1 Hz, A<sub>3</sub>), 3.70 (1H, t, *J* = 9.9 Hz, B<sub>6</sub>), 3.62-3.59 (3H, m), 3.47-3.15 (13H, m), 2.83 (1H, t, *J* = 9.4 Hz, D<sub>4</sub>); <sup>13</sup>C NMR (DMSO-*d*<sub>6</sub>, 150 MHz, 25 °C):  $\delta_{\text{C}}$  166.2 (C=O), 165.7 (C=O), 133.0, 133.0, 132.4, 132.0, 131.9, 130.1, 123.0, 129.0, 128.8, 128.7, 128.5, 127.3, 127.3, 126.9, 126.5, 124.1, 123.9, 100.5 (A<sub>1</sub>), 100.3 (C<sub>1</sub>), 97.9 (D<sub>1</sub>), 95.3 (B<sub>1</sub>), 76.7 (C<sub>3</sub>), 76.2 (A<sub>3</sub>), 74.2 (B<sub>3</sub>), 73.9 (C<sub>2</sub>), 73.0 (A<sub>2</sub>), 72.9 (D<sub>2</sub>), 72.7 (B<sub>2</sub>), 71.7, 71.5 (D<sub>3</sub>, D<sub>4</sub>), 70.9, 70.7, 70.6 (B<sub>5</sub>), 70.1 (D<sub>5</sub>), 69.3 (D<sub>6</sub>), 69.1 (B<sub>4</sub>), 68.8 (B<sub>6</sub>), 61.0, 60.6; HR-MS (MALDI-TOF): [M+Na<sup>+</sup>] *m/z* 1079.3169 (calcd. for C<sub>54</sub>H<sub>56</sub>O<sub>22</sub>Na: 1079.3161).

## NMR Spectra of AC<sub>2</sub>-CNN

(a)

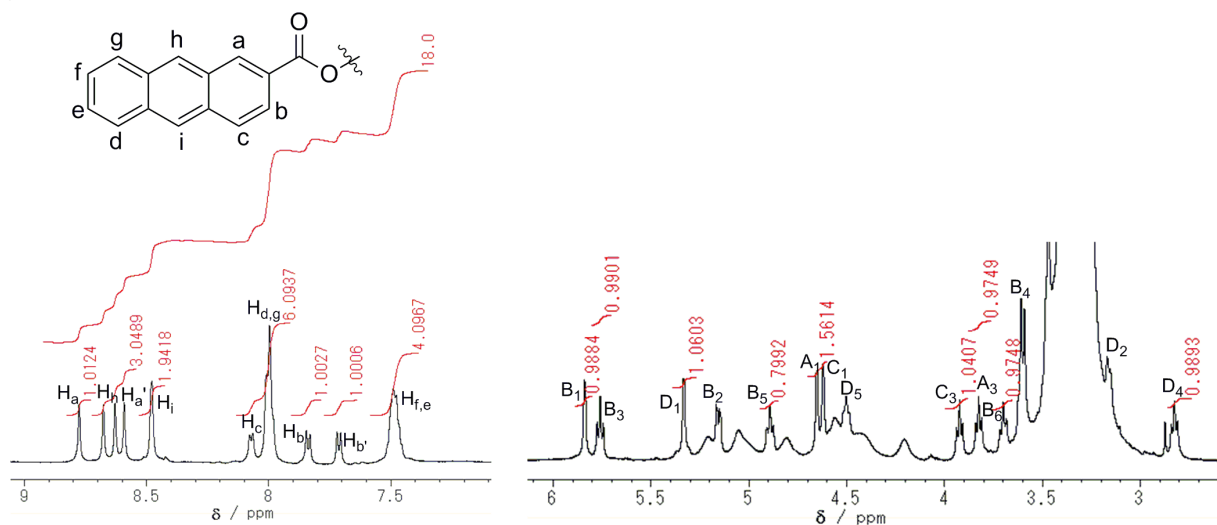

(b)

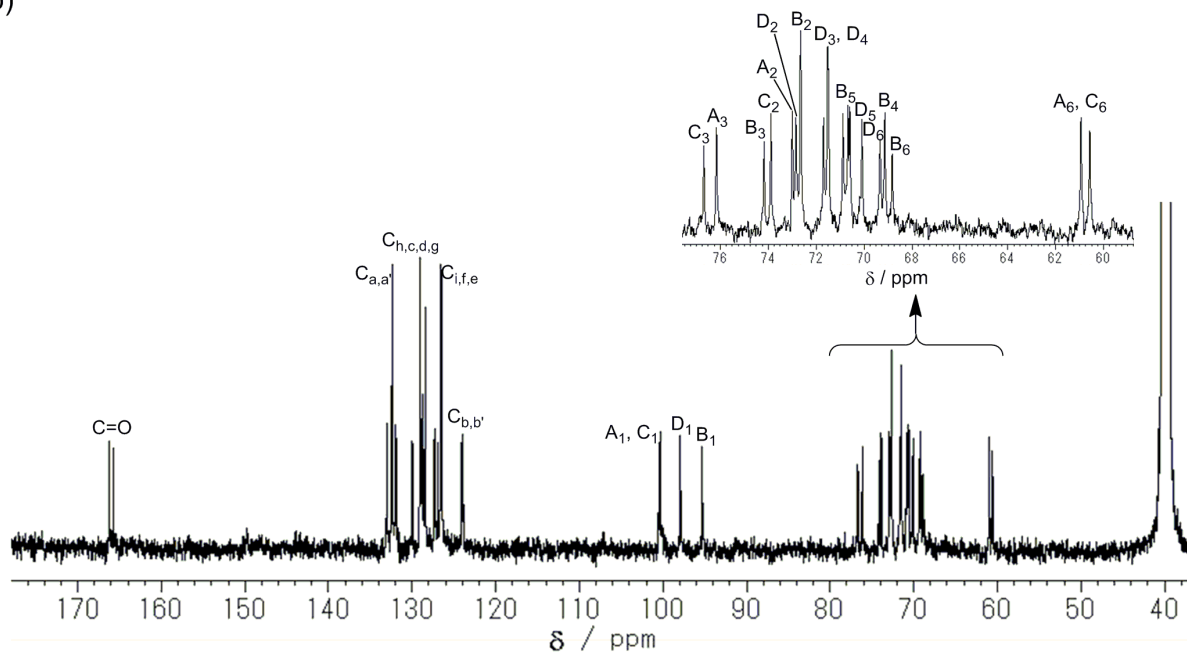

**Figure S1.** (a) <sup>1</sup>H and (b) <sup>13</sup>C NMR spectra of AC<sub>2</sub>-CNN in DMSO-*d*<sub>6</sub> at room temperature.

## HSQC Spectra of AC<sub>2</sub>-CNN

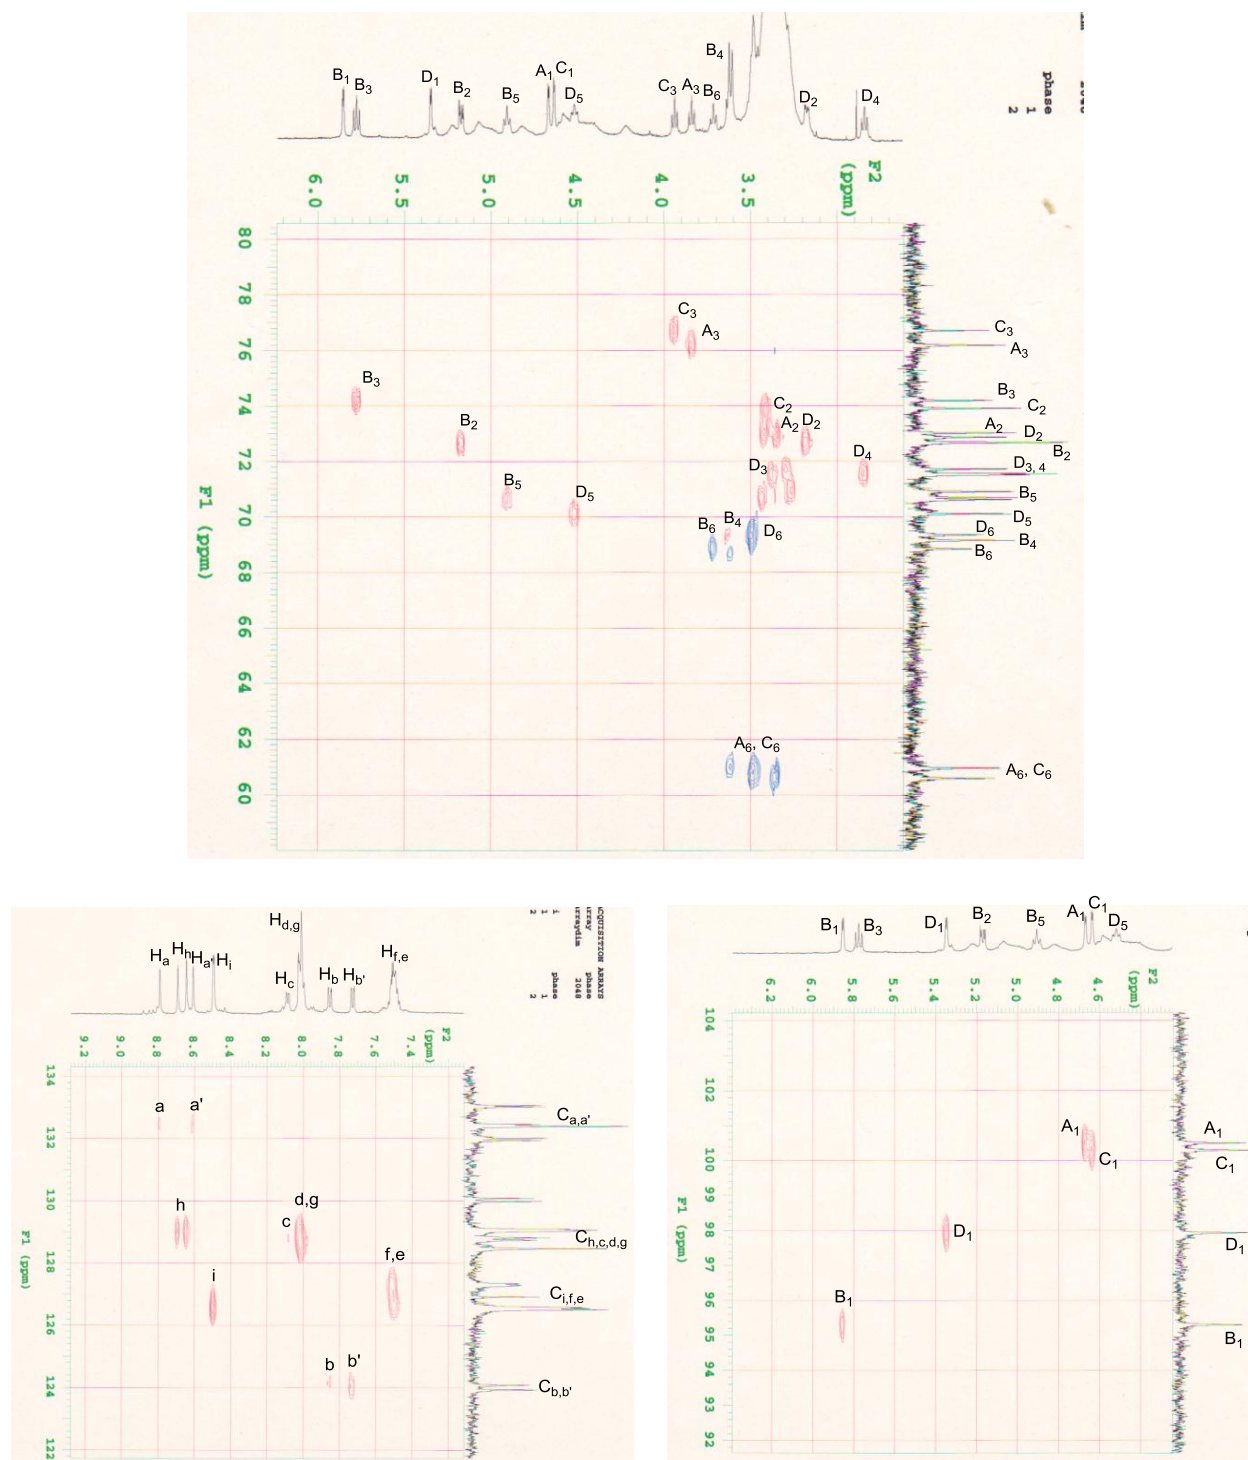

Figure S2. HSQC spectra of AC<sub>2</sub>-CNN in DMSO-*d*<sub>6</sub> at room temperature.

## COSY Spectra of AC<sub>2</sub>-CNN

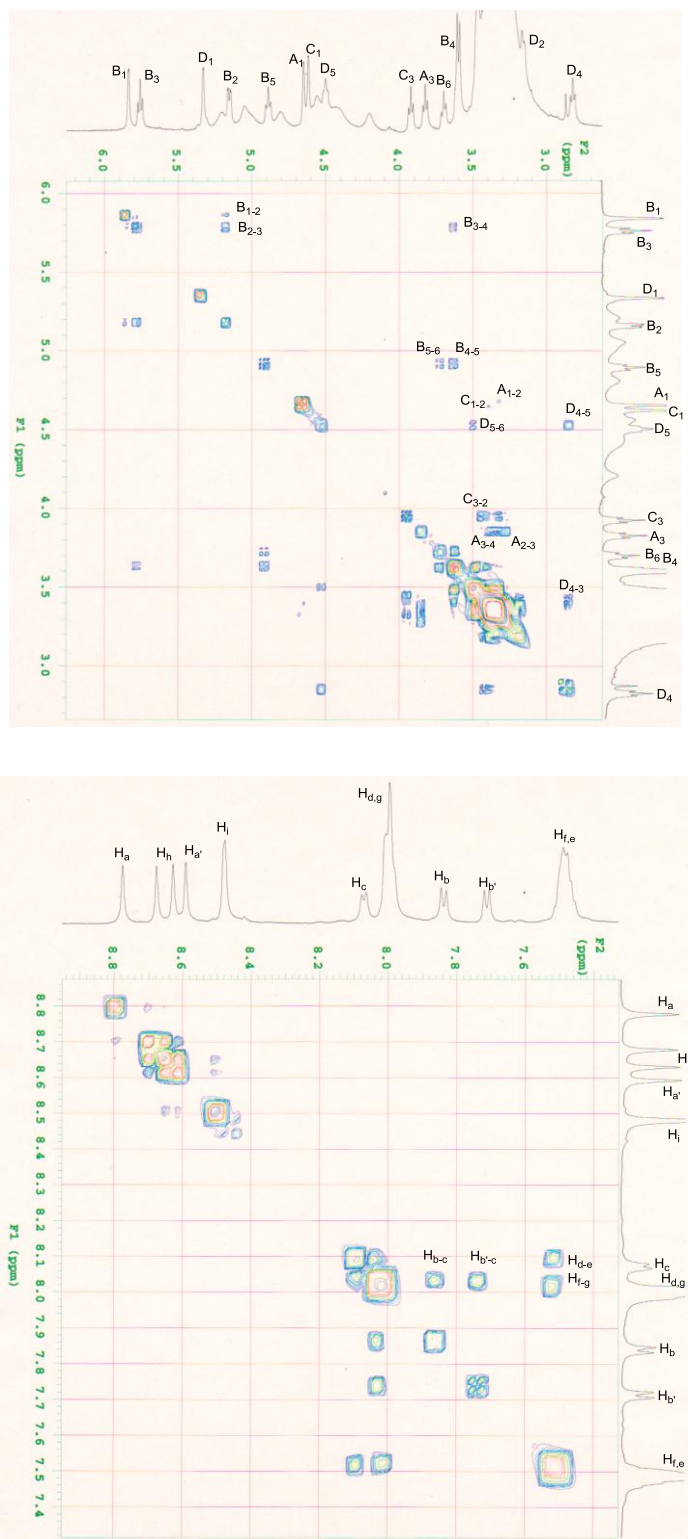

**Figure S3.** COSY spectra of AC<sub>2</sub>-CNN in DMSO-*d*<sub>6</sub> at room temperature.

### UV/vis and Excitation Spectra of AC<sub>2</sub>-CNN

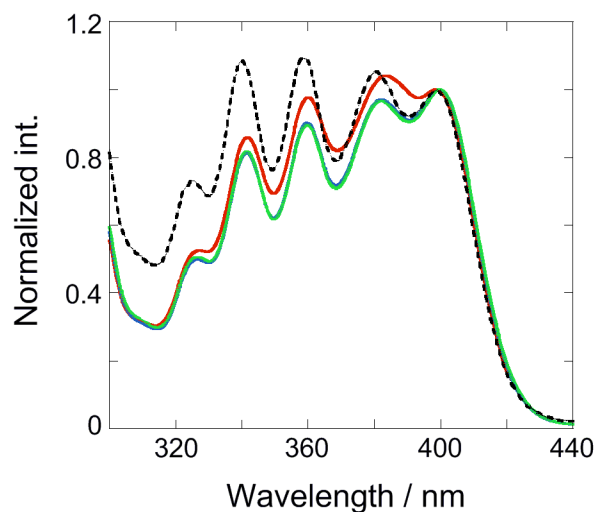

**Figure S4.** Normalized UV/vis (dotted black) and fluorescence excitation spectra (monitored at 450 nm (red), 500 nm (blue), and 525 nm (green)) of a CH<sub>3</sub>CN-H<sub>2</sub>O (45:55) solution of AC<sub>2</sub>-CNN (25 μM).

### Analytical Chiral HPLC

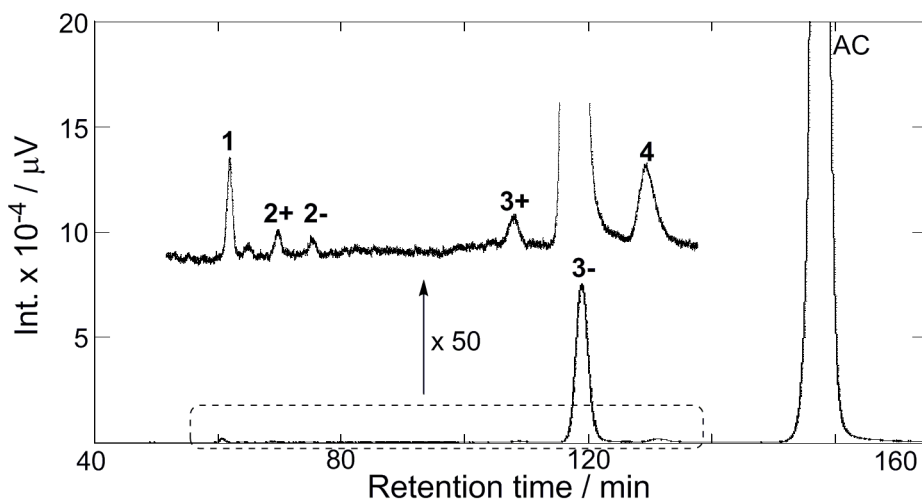

**Figure S5.** Analytical chiral HPLC chromatogram of the cyclodimers obtained by photoirradiation of AC<sub>2</sub>-CNN (29 μM) in CH<sub>3</sub>CN-H<sub>2</sub>O (45:55) at 25 °C and the subsequent saponification.



### *In-in, in-out, out-in, and out-out Conformers of AC<sub>2</sub>-CNN•H<sub>2</sub>O*

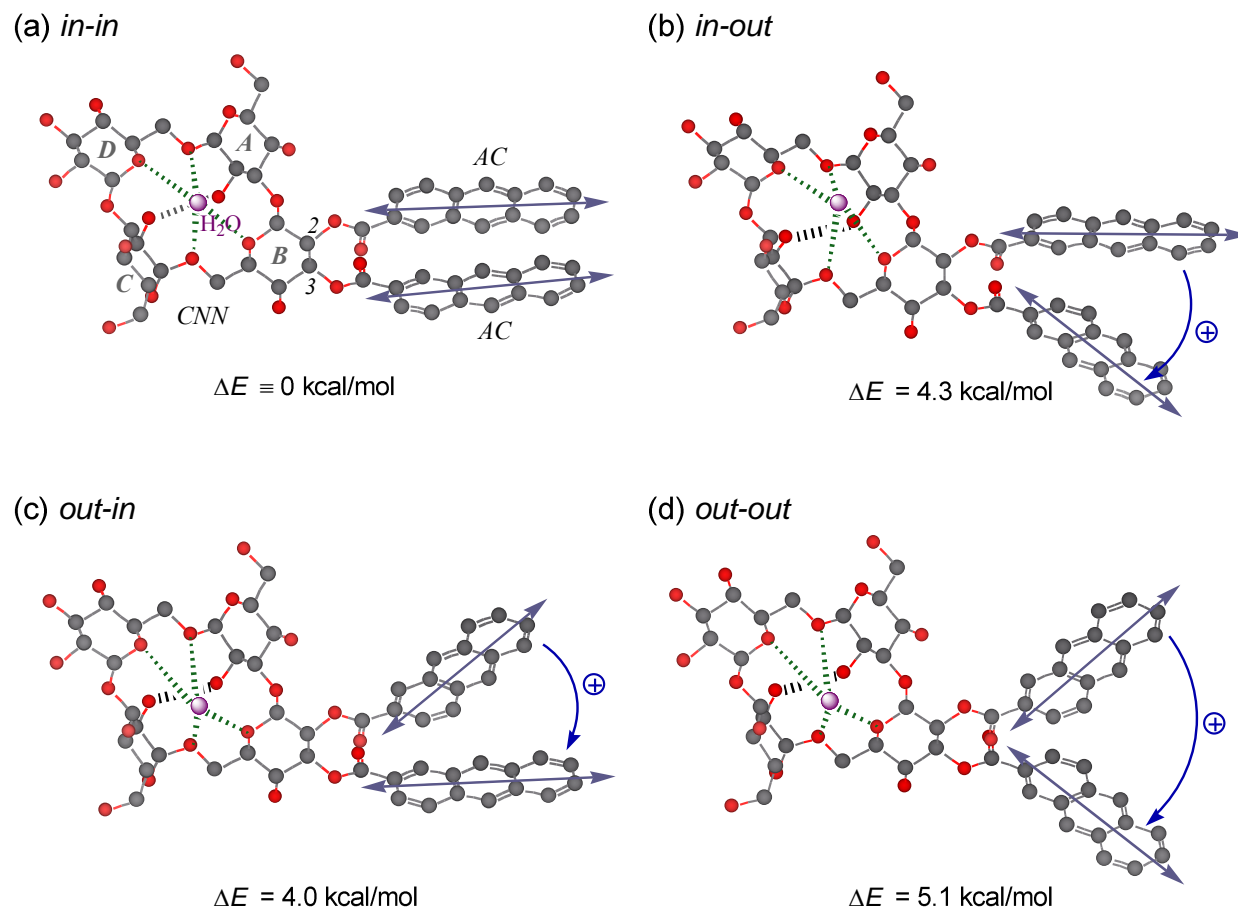

**Figure S6.** Schematic illustrations of representative *in-in*, *in-out*, *out-in*, and *out-out* conformers of AC<sub>2</sub>-CNN•H<sub>2</sub>O optimized by MM2 (no full structure search was made); hydrogens are omitted for clarity purpose.

**Discussion.** In the optimized structures a-d, the 2-OH of glucose residue C is hydrogen-bonded to the 2-OH of residue A (a black hashed broad line in the back) and the water molecule (shown as a shaded magenta sphere in the center of the CNN ring) forms four hydrogen bonds (hashed green wedges) bridging all of the A-D glucose residues of CNN (as was the case in the X-ray crystallographic structure; see refs 10 and 11 in the main text). These hydrogen-bonds jointly maintain the rigid saucer-shaped structure of CNN.

The double-headed arrow indicates the direction of transition moment of AC's <sup>1</sup>B<sub>b</sub> band, while the curved arrow shows the right/left-handed helical arrangement of the two transition moments, leading respectively to the positive/negative exciton coupling in CD spectrum, according to the exciton chirality rule. Exciton coupling amplitude is known to critically depend on the angle and



distance of the coupling transitions (see ref. 12 in the main text) and hence the positive exciton couplet experimentally observed (Figure 1b) should reflect the weighted average of all the conformers, including many others that are not shown in Figure S6.

### **Fluorescence Decay Profiles of AC<sub>2</sub>-CNN and Methyl 2-Anthracenecarboxylate 5**

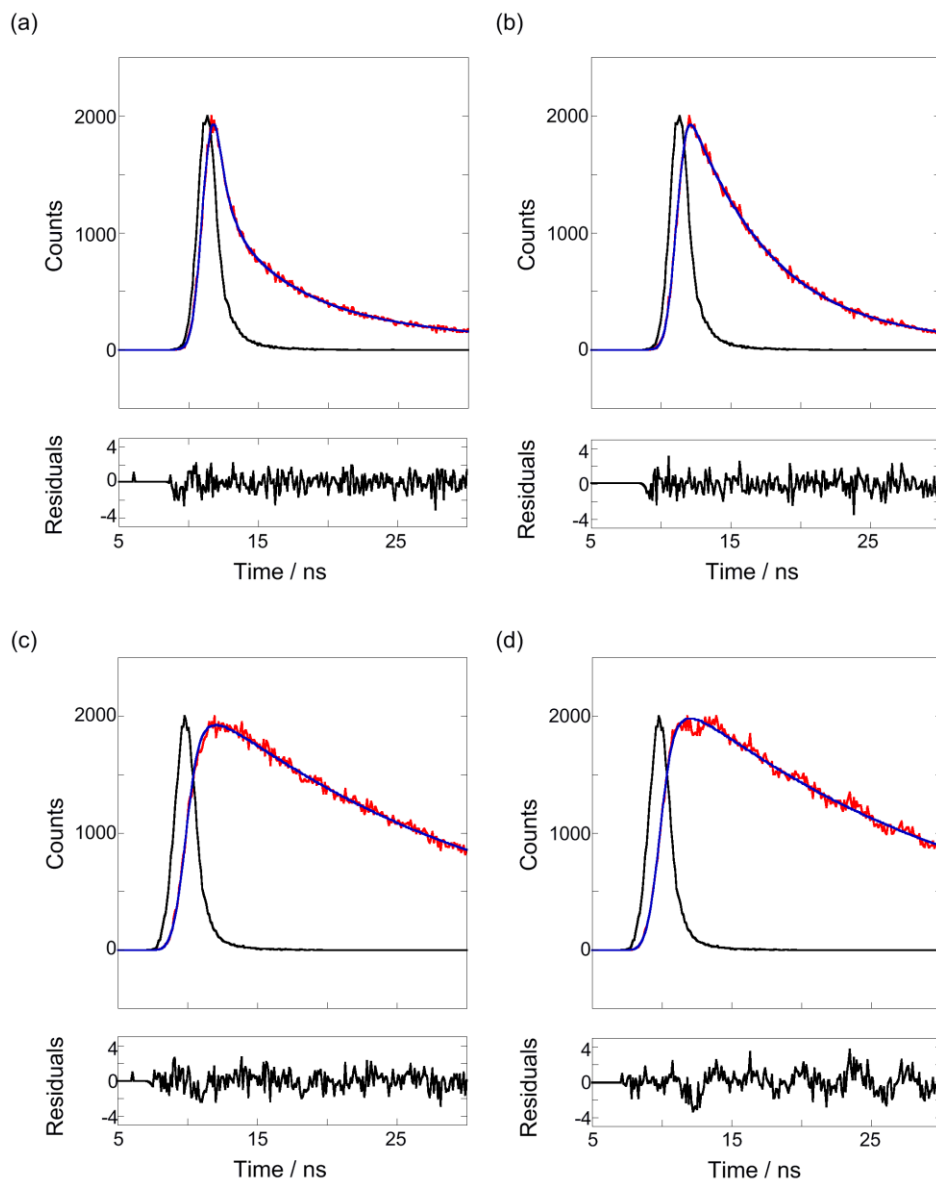

**Figure S7.** Time-resolved fluorescence decays of 31  $\mu\text{M}$  AC<sub>2</sub>-CNN (a, b) and of 25  $\mu\text{M}$  5 (c, d), both monitored at 450 nm (a, c) and 515 nm (b, d) in 45:55 CH<sub>3</sub>CN-H<sub>2</sub>O at room temperature; excitation at 300 nm; black (IRF), red (decay profile), blue (fitting result). The residuals correspond to the fit of the decay to a sum of three exponential functions for AC<sub>2</sub>-CNN and to a single exponential function for 5.
